# Supplementary material
Source: PubMed Central journal article supplement (PMC3999643)
Supplement: NIHMS567604-supplement-Supplemental_material.pdf [file NIHMS567604-supplement-Supplemental_material.pdf]

**Supplemental Table I: Race- and gender-specific lipid levels in the ARIC study cohort**

| Lipid fraction           |                          |                        |                                 |                              | P-value† by race |         |         | P-value† by gender |                   |         |
|--------------------------|--------------------------|------------------------|---------------------------------|------------------------------|------------------|---------|---------|--------------------|-------------------|---------|
|                          | Caucasian Women (N=4763) | Caucasian Men (N=4141) | African American Women (N=1622) | African American Men (N=893) | Women            | Men     | Overall | Caucasians         | African Americans | Overall |
| sdLDL-C, mg/dL           | 45.07<br>(.3206)         | 45.35<br>(.3070)       | 36.57<br>(.4323)                | 38.84<br>(.6268)             | <0.0001          | <0.0001 | <0.0001 | 0.5286             | 0.0023            | 0.0009  |
| lbLDL-C, mg/dL           | 78.79<br>(.4182)         | 75.31<br>(.4281)       | 87.85<br>(.7210)                | 83.87<br>(.9142)             | <0.0001          | <0.0001 | <0.0001 | <0.0001            | 0.0008            | <0.0001 |
| LDL-C, mg/dL             | 123.60<br>(.4985)        | 120.81<br>(.4846)      | 124.31<br>(.9038)               | 122.69<br>(1.1831)           | 0.4790           | 0.1100  | 0.0597  | 0.0001             | 0.2822            | <0.0001 |
| sdLDL-C/LDL-C ratio      | .3631<br>(.0022)         | .3765<br>(.0024)       | .2961<br>(.0032)                | .3166<br>(.0043)             | <0.0001          | <0.0001 | <0.0001 | <0.0001            | 0.0001            | <0.0001 |
| Total cholesterol, mg/dL | 209.41<br>(.5306)        | 191.71<br>(.5350)      | 203.24<br>(.9575)               | 193.29<br>(1.2391)           | <0.0001          | 0.2197  | 0.0794  | <0.0001            | <0.0001           | <0.0001 |
| HDL-C, mg/dL             | 55.472<br>(.2407)        | 41.695<br>(.1933)      | 56.105<br>(.4073)               | 47.952<br>(.5391)            | 0.1832           | <0.0001 | <0.0001 | <0.0001            | <0.0001           | <0.0001 |
| Triglycerides, mg/dL     | 153.78<br>(1.3302)       | 150.04<br>(1.4051)     | 114.81<br>(1.5708)              | 115.46<br>(2.2402)           | <0.0001          | <0.0001 | <0.0001 | 0.0532             | 0.8076            | 0.9889  |

\*Data presented as mean (standard error of the mean).

†P-value for test of differences in means, and p-value by race and gender.

**Supplemental Table II: Association of the top SNPs in 8 loci with sdLDL-C/LDL-C ratio**

| SNP        | Location  | Chromosome | # Sign SNPs | Coded Allele | Allele Frequency | N    | Beta     | SEBeta   | P                      | Gene                           |
|------------|-----------|------------|-------------|--------------|------------------|------|----------|----------|------------------------|--------------------------------|
| rs964184   | 11q23.3   | 11         | 42          | C            | 0.8588           | 6860 | -0.04646 | 0.003705 | $4.40 \times 10^{-36}$ | APOA5/A4/C3/A1/ZNF259/BUD13    |
| rs4420638  | 19q13.32  | 19         | 4           | A            | 0.8264           | 6860 | -0.03217 | 0.003545 | $1.13 \times 10^{-19}$ | APOE/C1/C4/C2/TOMM40           |
| rs1260326  | 2p23.3    | 2          | 7           | C            | 0.5856           | 6860 | -0.02206 | 0.002637 | $5.98 \times 10^{-17}$ | GCKR/IFT172/ZNF51              |
| rs2980855  | 8q24.13   | 8          | 32          | C            | 0.4682           | 6860 | -0.01807 | 0.002547 | $1.28 \times 10^{-12}$ | TRIB1                          |
| rs13244268 | 7q11.23   | 7          | 22          | C            | 0.1232           | 6860 | -0.02587 | 0.003935 | $4.87 \times 10^{-11}$ | BAZ1B/MLXIPL/TBL2/BCL7B/VPS37D |
| rs508487   | 11q23-q24 | 11         | 2           | C            | 0.9402           | 6860 | -0.04084 | 0.006312 | $9.75 \times 10^{-11}$ | PCSK7                          |
| rs995000   | 1p31.3    | 1          | 70          | C            | 0.6687           | 6860 | 0.015624 | 0.002702 | $7.32 \times 10^{-9}$  | DOCK7/ANGPTL3/USP1             |
| rs7586601  | 2p23      | 2          | 1           | A            | 0.556            | 6860 | 0.014932 | 0.002615 | $1.12 \times 10^{-8}$  | NRBP1                          |
| rs11208046 | 1p31.3    | 1          | 31          | C            | 0.5658           | 6860 | -0.01331 | 0.002605 | $3.22 \times 10^{-7}$  | ATG4C                          |
| rs12678919 | 8p22      | 8          | 3           | A            | 0.893            | 6860 | 0.021005 | 0.004236 | $7.12 \times 10^{-7}$  | LPL                            |

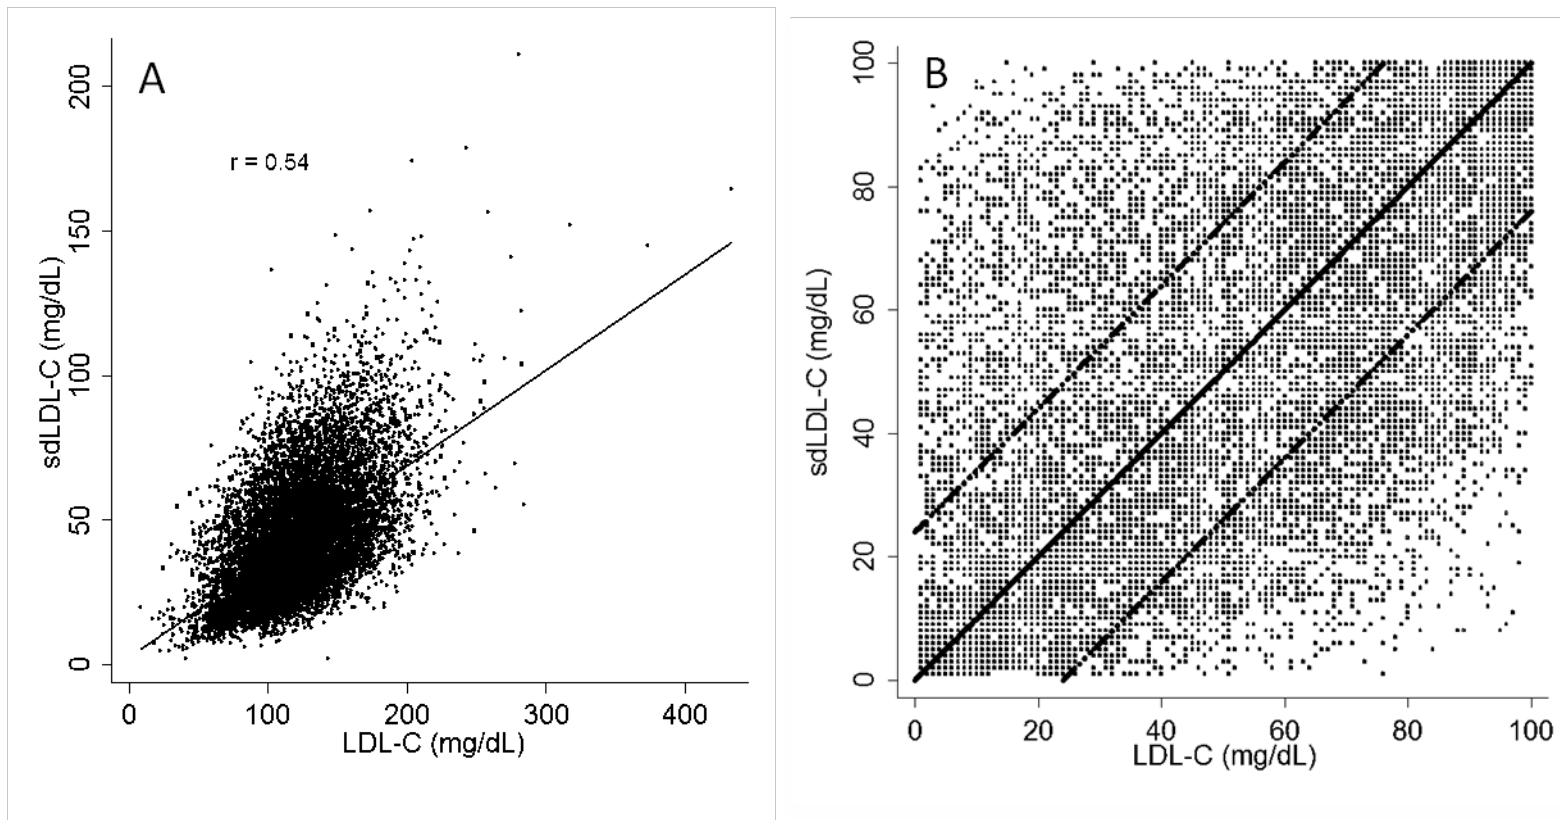

**Supplemental Figure I: A)** Correlation of LDL-C and sdLDL-C concentrations among 11234 ARIC participants. **B)** Relation of LDL-C and sdLDL-C levels given in percentile units. The dashed lines bracket concordant LDL-C and sdLDL-C values defined as those within  $\pm 24$  percentile units.

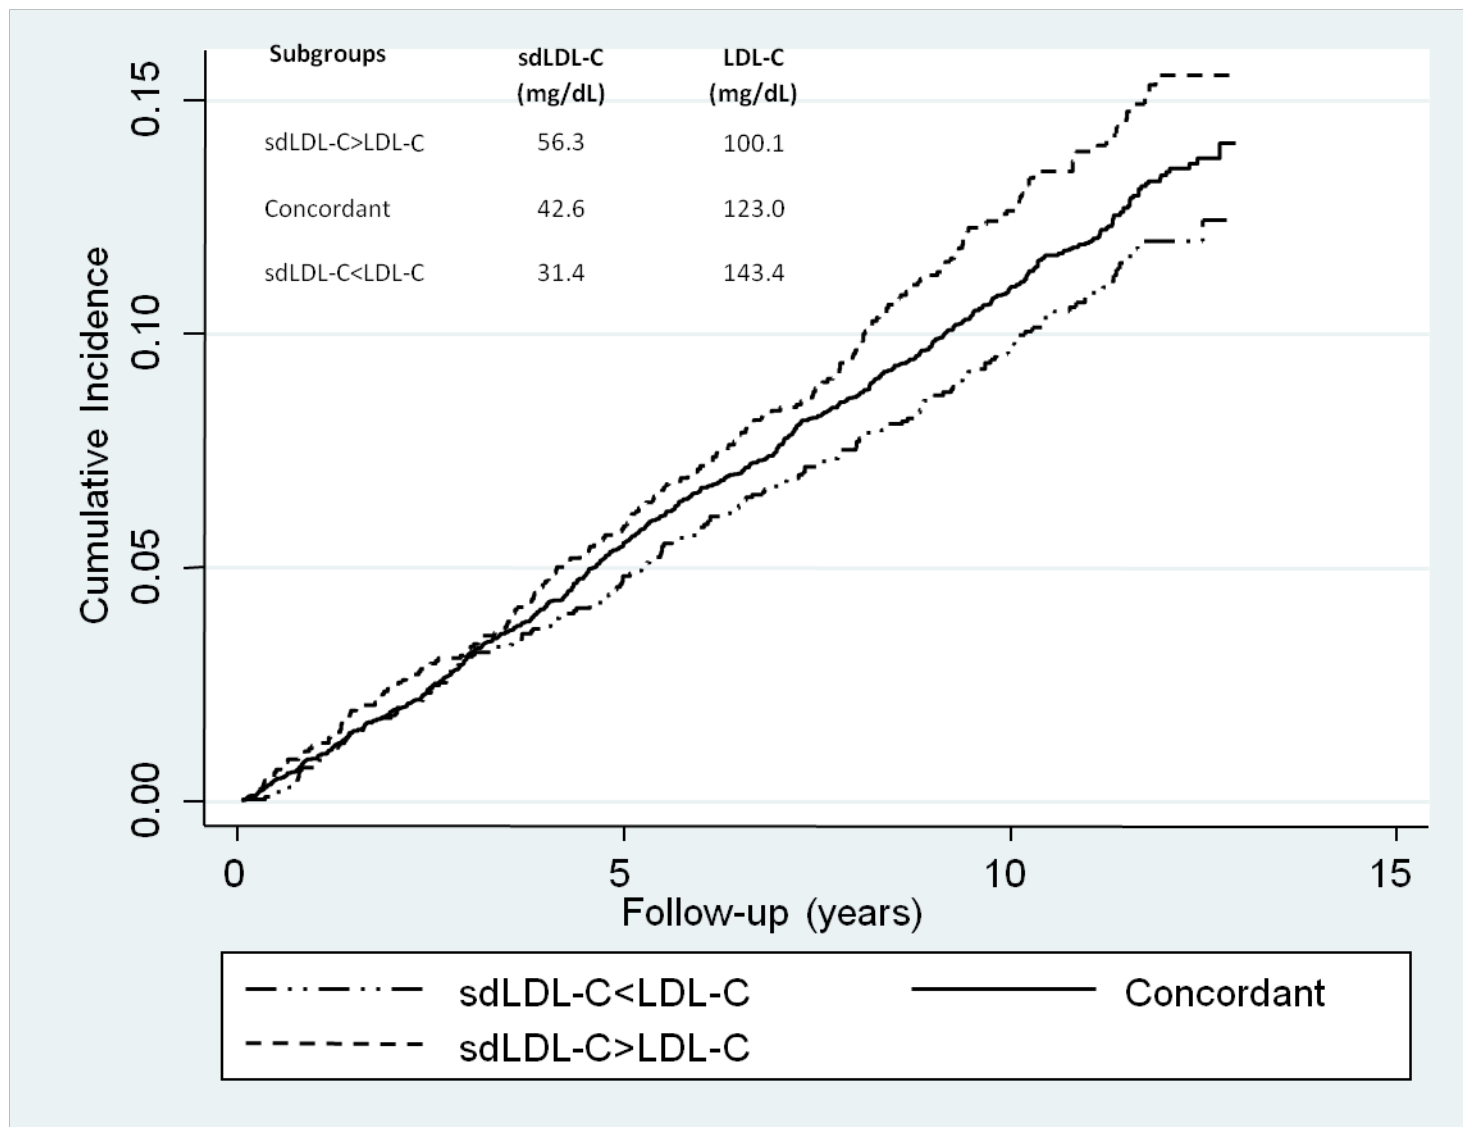

**Supplemental Figure II:** Cumulative incidence of cardiovascular events in sub-groups with concordant or discordant levels of LDL-C and sdLDL-C from proportional hazards models adjusted for age, gender, and race.
